# Supplementary material
Source: Springer Nature journal article supplement (https://www.springermedizin.de/resource/supplementary/12911_2009_312_MOESM1_ESM.pdf/9525452)

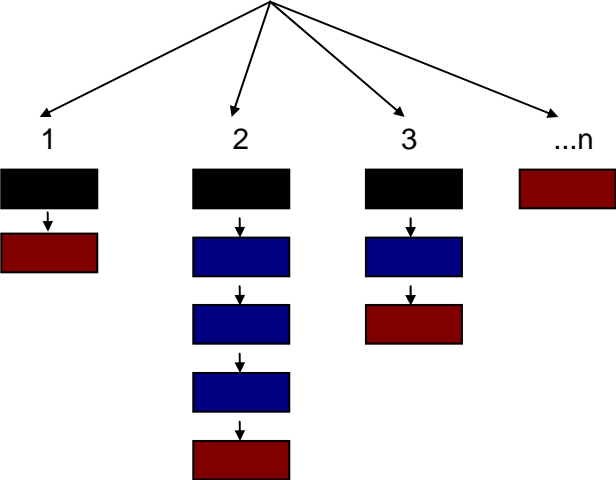

Supplement: MOESM1 [file 9525452]
